# Supplementary material for: A New Family of Membrane Electron Transporters and Its Substrates, Including a New Cell Envelope Peroxiredoxin, Reveal a Broadened Reductive Capacity of the Oxidative Bacterial Cell Envelope
Source: PubMed Central journal article supplement — mBio. 2012 Apr 3;3(2):e00291-11. doi: 10.1128/mBio.00291-11 (PMC3322552; doi:10.1128/mbio.00291-11), 2012-04-03

A

Glo\_vio : -----MRWLTF-----MFWFVAGFAVLTVPVAALFVR---SAHTEAELHSEVRSVQFGRPFVADRLKMDPWHYVWLNPGSGSTATTQ-----WQQPAGIQAGPLRWFPQRTAAAPP---LASYGYEGLVYLLSEIQ : 119  
Myx\_xan : --MTHQSKRLGVVGGIGLLVAAVAVADLPASAVASSAPDEGDFRIEGADLVDATEVVKFGDTFRVGRFRDPPSWHYVYWRNPGSGLETEVA-----WDTFG-VTVGFLQWFPQTFRTPDGFIITHGYDGBAILIADAK : 133  
Cau\_cre : -----MFLKKAVLALQALVMGAMLLGGHALAGPVVN---SGHVESELDVAQEAGIAPGGTIYVAIRQKIDAPGSHVYWRNPGDAGEPTKIT-----WTLEEGWSAGDMVWFTF---VKTRLGLHLLDYAYKGEVLIIPVET : 121  
Hyp\_nep : -----MD---ERRAEALADRVSVAFGDTFYAAIKMTDESWHYVWQAGAGLPPRLILEEGTSLBED-AVGAFIWEHPLHLPVVEGIMDYGYDDEVIYFAFFVT : 98  
Sac\_deg : MFVPPCFKRFGLKATKAVRVLGVVVFVFAICLAAQAQAQSTAFGDHVKVWMLAPDS-LIAGQOEVIIGFYFVLDLSEHYVYWRNPGSGAAPRFD-----IQVQGATLGEVWVWF---TFLPIEHLNLYGESHAYLLLET : 132  
Sal\_typ : -----MMILFRRILFCLLMLLPLVSWAAES-GWLRSPDNHDHSTRIRADTSANG---ETRLLDVWLENKRTYWRPAGGGVAPSLA-----WKG-DMPEVSWWVWF---SRFVANIITQGYHDETFPMIVR : 118  
Rho\_rub : -----MSRFLALCLFLCLPQAQAGNDPGASAVWEKSHSRMRLSVAASAAGKAEIALQVQEVAPKHYWRSPGAGYPPSFD-----WTGSLNLGATPFRWVFP---TRFSVLGETYGYEHOVLIPLMAR : 123  
Chl\_tra : -----MIRQWYGFLLCLLFSYTSCEFVEENSGRATPTVELVSESEQAIECEVLRIGVLIAPBESEHYVWRNPGKLEMPLRIS-----WDLSEGCRLLEEHWFP---EIFEEDGWVYFYKSHTMVVALIR : 118  
1 g 6 gwh YW npGd G w WP P 6 gY v

Glo\_vio : APADLPKGAATRAKAEQTECKVCELGAGTVALELTVQA-EATAPSVHADAIAAARGHIVVTIA-DWKLRAAVQEGQLIIRA---TRPEWFAGEIGPVTFPEQDILLPEAAHVLLEV-----RFDGLFKLKRSAV : 248  
Myx\_xan : AVEGSPSTG-LIIVSAAEYHVEVHCIPAEMLMTRSLPHGP-QTVRDAETAAVVDTEKIKRPPAK-DSGPAATVALDAPQITAGQDFTGTLTAPGGAAPVAVGDFVADRIFGVVRVGLASDGGFRFKKGAKEPD : 270  
Cau\_cre : AANAQPGTTLSTLADWFLVCEQVCHIEQAQKLSLLELVVAGTPADPKPWGAVIGKVLADAPKPAKGLKAVFK---LEGQALKAV---TGGPLKGMAGAYFSPYSSKVEHAHAERAIER---GAEGLTLKPG-Y : 249  
Hyp\_nep : VEPDASG---EVRIKVAEADYHCESTICTHETADVSHLTPVGA---PIENAVAGAEIGKVARVDFVDFGEARIIDDAEPWTLISRQ-----PGGFPEGAQIR---FSPFK-HEHSHPAAPQKA-----GAEGASHLTPDRA : 221  
Sac\_deg : AD---LQTSEVIVNVSLEWLVKVDCTIEFGFMSRILPHTN-QSLWLADPLDALRDGYLALVQOQNTSPWQAVKAQVGTQQLTLANHSTRLAQGDFFNSVSVGPEVDEGLVATKPKIKSN-----AAGLELTFNRVPG : 262  
Sal\_typ : GT---LEPAT---LRGVTLSTGASNVCLLT---DYFYSVPTTV---QNAD-FAHDYARAWKILRIS---GLTDSLVDVYRPEGLV---VTATRAAGWSPPGLDLDVDDVDFAKPRIRVDEGDRLOQATVPTVDSWGEKAP : 238  
Rho\_rub : LE---RPGDPTIRLAWDYLCAEVCFVDRGDFLIVPEGPP---SGASPAQALARSIMQVGPSPSHGTYDEAVIETGGVVR---VAVRADPPLAAPDLVEAPAGAFARFQVTVVEGGRAVLRAGVGGD--- : 249  
Chl\_tra : VS-KEIETRPEIKAQEELISGASCLFGSSSRVIVIPDEGPLIPNSKETETTFSRALGCEVLRIGVLIAPBESEHYVWRNPGKLEMPLRIS---KADRATQAWFIAENTRDFAYAQEVPLELATTYIWKLKHPEGNMFKGILGSG : 253  
6 1 C C6p 1 6p a P q

Glo\_vio : STATPERIAGV-----VAPAGWRGAGSEQALSVR-----VALEFVAALISAG--APDLAG---LLVAVGFAHGGMILNLMPCVPLVLSIKVLEGFQEAR---TGHAWRYGATATAGVITASVWL : 355  
Myx\_xan : AQASAPDLTGVLRLGTAATGYQYLEVTAPLAPLVAAGGAAGTFAVVKPPSVKDSIAAVKFEVGAATTPPAEASSMG---LGLAVFAHGGMILNLMPCVPLVLSIKVLEGFQEAR---TGHAWRYGATATAGVITASVWL : 406  
Cau\_cre : DFVGGSTPPAEI-----VGLVATKAGAWVETATAGEAAGASG---LGPPEAAAPGGALAGG---LAGALFAHGGMILNLMPCVPLVLSIKVLEGFQEAR---TGHAWRYGATATAGVITASVWL : 363  
Hyp\_nep : GSTAETLDGVTR-----IDVPGAEPVGYEIASASRGEAFAGTADBNVQSALPGTSGAGAPDAGDGAALGWORIATLAFFAHGGMILNLMPCVPLVLSIKVLEGFQEAR---TGHAWRYGATATAGVITASVWL : 348  
Sac\_deg : AALPTATDEVVVD-----GNRAFWLN-----DIALVNQAVLLPANSQSQTQPSWTLIIGAFHGGMILNLMPCVPLVLSIKVLEGFQEAR---TGHAWRYGATATAGVITASVWL : 363  
Sal\_typ : DLRNKSITLIVADR-----ATAQFS---TQTGTAPAQTFDN-----AALPFOQVVMMAHGGMILNLMPCVPLVLSIKVLEGFQEAR---TGHAWRYGATATAGVITASVWL : 336  
Rho\_rub : ALIGQSLPVLVADG-----VRGVEAGVDTRRALAPPACAGDRPTALGEGSGGETGAPGAPTGLPLAFAMVSVALLGGMILNLMPCVPLVLSIKVLEGFQEAR---TGHAWRYGATATAGVITASVWL : 370  
Chl\_tra : ILIFKDDAGKVVAS-----YQVEENQVEQLSALSWR-----FLSILMFAHGGMILNLMPCVPLVLSIKVLEGFQEAR---TGHAWRYGATATAGVITASVWL : 344  
A GG 6LN6MFCV P66 6K G 6 3F

Glo\_vio : LAGGHLRAGGECGHWGRCQCEHFLVLCVAVLEFGNIRGIEFVGTG-----LTRIGG-AGPAGTGCCEGEGVLTATVATPCTAFPMGSAIYALTPQVWAAIIVETALGIGMSPYLLGLSIALLRVVPKPG : 407  
Myx\_xan : LASVWVAVRAGSASVGGRCQCEHFLVLCVAVLEFGNIRGIEFVGTG-----LTRIGG-AGPAGTGCCEGEGVLTATVATPCTAFPMGSAIYALTPQVWAAIIVETALGIGMSPYLLGLSIALLRVVPKPG : 539  
Cau\_cre : LAGALAVRAGSAAVGGRCQCEHFLVLCVAVLEFGNIRGIEFVGTG-----LTRIGG-AGPAGTGCCEGEGVLTATVATPCTAFPMGSAIYALTPQVWAAIIVETALGIGMSPYLLGLSIALLRVVPKPG : 496  
Hyp\_nep : LAGAMAVRQATGSAIYGGRCQCEHFLVLCVAVLEFGNIRGIEFVGTG-----LTRIGG-AGPAGTGCCEGEGVLTATVATPCTAFPMGSAIYALTPQVWAAIIVETALGIGMSPYLLGLSIALLRVVPKPG : 481  
Sac\_deg : LEAVMLGLRAGCAALGGRCQCEHFLVLCVAVLEFGNIRGIEFVGTG-----LTRIGG-AGPAGTGCCEGEGVLTATVATPCTAFPMGSAIYALTPQVWAAIIVETALGIGMSPYLLGLSIALLRVVPKPG : 491  
Sal\_typ : LEAFMLLRLSNHAIYGGRCQCEHFLVLCVAVLEFGNIRGIEFVGTG-----LTRIGG-AGPAGTGCCEGEGVLTATVATPCTAFPMGSAIYALTPQVWAAIIVETALGIGMSPYLLGLSIALLRVVPKPG : 470  
Rho\_rub : LALAAALGKTAGMAGVGGRCQCEHFLVLCVAVLEFGNIRGIEFVGTG-----LTRIGG-AGPAGTGCCEGEGVLTATVATPCTAFPMGSAIYALTPQVWAAIIVETALGIGMSPYLLGLSIALLRVVPKPG : 505  
Chl\_tra : LAFCALILKVLQNLGGRCQCEHFLVLCVAVLEFGNIRGIEFVGTG-----LTRIGG-AGPAGTGCCEGEGVLTATVATPCTAFPMGSAIYALTPQVWAAIIVETALGIGMSPYLLGLSIALLRVVPKPG : 484  
La 64 g gwGf Q p 6 6 6 1 l G Fe g g g f G la 6atPC P6f g a g a 6F aglG a P5 p 6P4PG

Glo\_vio : AMMETRQAMGLLMDGIVWVWVGLQAVSALAAALLAVLVG-----AAAWLKGWGHMAAPATRLRVARVLAALGIVGLVALVGVQQAASGGPTQATATPSEGRWEAASFCRVAALRAAEETVEVIDETAA : 621  
Myx\_xan : AMMERKROVGGALLAMTIVWVWVGGGLAVDGMARLLAFIVAVG-----LVTALYQQG---QAQDGVKRLATVAVAAVGLVAGSLLTLRFDDQ---DPVEAPRVGTVQAQCPNSADRNAAALAGQVVIDETAD : 665  
Cau\_cre : DWMEVIRKGLIABEMYGAAILWLVVFAQQAPIALGOLLVAVGLAA-----FGAWLYGLAQRRAVGVKGSASVMIIGLLAVVGLALAAASALSAPVVAASSTPSPG-GLTAEANSERVQALQAEGRITVIDETAA : 629  
Hyp\_nep : KMMDTIKQAFABEFLLAAWLVSVVAGLAGAGAVGWTLAGATTLV-----FAIILG-----RQGGAVRKQVAALVAAAFIYPAVQANVPTSVAGSSEAPFTG---AYGEAANSVEVEAMLADCRVVIDETAS : 604  
Sac\_deg : FMMETRQFIAEFVAVVWLVVGLVGRVLEDIGLVGASLMLSFV-----VAIILAS-----TLQWGKIGRSVYICLGAVVAEVFSLSLAIP-----SGNKSQSETSQNNKEDSQTAQAPQCRVVIDETAA : 611  
Sal\_typ : FMMNIVRRIILGMLGSAIWAATLILPHFG-----AVVAARVCGGLLAVALGVRLRPIIS-----PLSGVAAALLGIAALALPALPEALSLPMAAFPSQALEETAWGRSPEVAVRIVDEKTVVIDETAD : 538  
Rho\_rub : FMMTRRRAVIGAVGLDPAWLVSVAVQICAVVAARVCGGLLAVALGVRLRPIIS-----PLSGVAAALLGIAALALPALPEALSLPMAAFPSQALEETAWGRSPEVAVRIVDEKTVVIDETAD : 625  
Chl\_tra : FMMSTRRQLTGMILANATWLVWVGVETSATAVITLVLVGLLAA-----VGAAILG-----RWGTLVSPNQRLLASVVFICILSSLVITSIGVRFIDENFPAHSSDWCSEPEHLDLREKIEFVWVNTAK : 610  
WM 4 f 6 WL 6 w s 6 a g 6f61 TA

Glo\_vio : WCISQVNERVAESSPQVREAGRGVVMKADWTRRDAATQAALQAFGRSGVFLVYLSTAGAPAFRILEPEVLPDITKAKIQELS----- : 708  
Myx\_xan : WCLTCKENERTVLSSTDVDRDAKKHQAFFIADWTRRDAITTRLAEGHGRAGVFLVLSLSTAGAPDPKPEVLPPELLTGGVWTDATRAAACAPSKLNGANVLAAGFPSSH : 774  
Cau\_cre : WCVTQVMEKVALSGPRVABAKQAQAVLIRADWTRRDPVIAKALADFGFRVGVPLVLY---PKNGGSEVILPQLLQEGMVLEAHERAGS----- : 716  
Hyp\_nep : WCASQVNMKLTLDKTRKVDANKSANVAFIVADFQKDPMAEBIKLRAAGVPMYLYW---PAGASEPQILPELLQELVIGLVEG----- : 688  
Sac\_deg : WCLTQVNMKLVLDQTPQDSKKNVYLVLRADWTRRDAITQSLAQQLGNSVPMYAWY---GKGADEVVILSOLLRAGSIDALFEQK----- : 696  
Sal\_typ : WCLTCKVKNYVILQKELVQALQDPVAVRBDWTRRDAITDFDKTRQVAVFVQVYGGGLP-EGEALFLLLRADVAIQTLKKAKGITQ----- : 628  
Rho\_rub : WCLTCKVKNYVILDAAPTRALLDSGRSGRADWTRRDPVIAKALADFGFRVGVPLVLY---PKNGGSEVILPQLLQEGMVLEAHERAGS----- : 715  
Chl\_tra : WCCTQVNMKLVLDQTPQDSKKNVYLVLRADWTRRDAITQSLAQQLGNSVPMYAWY---GKGADEVVILSOLLRAGSIDALFEQK----- : 692  
WC 3C N 1 af ad5T d I La gr 6P y p Ip L3 6



B

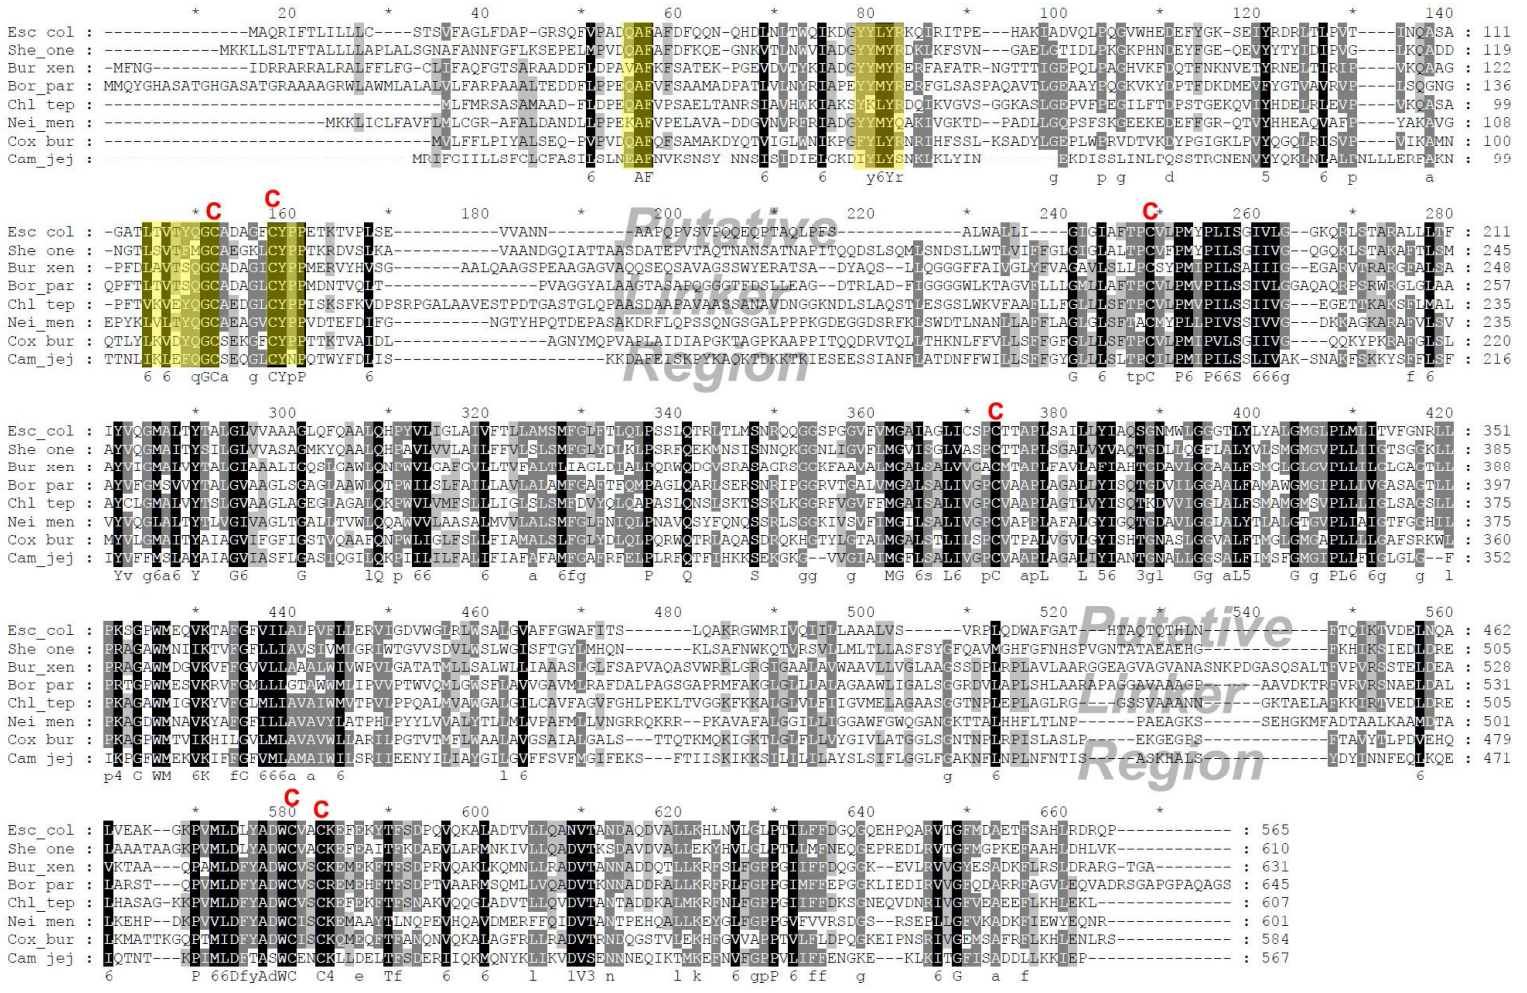



C

```

NP_697507Brucella      : -----MKICTSIIAPFIIAVIIAIP--AQASTSAWTETPGGRVRIIVIEGGDFAITGKQEVIRGALQIETLRFGWKTYWRNF : 71
NP_353804Agrobacteri  : MSVRIFFFFSHLRLAVVFAALIGGGCAAQAEITDWARSEGGCMRVAS----LAMDADGVVRGVLOIEPKIGWITTYWRFP : 75
YP_354084Rhodobacter : -----MLRRLFLASCIATAFAAATPPDQILKAELLEPC-----WREGGRHIAALRIKIAEGWKTYWRSP : 60
YP_180121Ehrlichia   : -----MLRISFIFIVLITLLTYQNGYSAKSPDPVNIKLIVG-----SMLMKNRITINIGVDFRIQEGWHIYYKSE : 64
                        :                               la l a gg                               6 GW tY54 P

NP_697507Brucella      : GLAGVPPQIS---IEGLAKAQTAFVAFVRFAGDEEGGIG---YKQVSIKIVTFHIEP---GGKR--LKGHAFIAGMCPN : 138
NP_353804Agrobacteri  : GEAGIPPCITPDFASGVSLTMMAYVVPKLIENGDIITDIG---YDHAVSIKPFQLKATD---FAASGTIDITAFIGVCCN : 147
YP_354084Rhodobacter : GEAGIPPEFDWSGSRNVSGVRMHWVPHVFSLNGMOTIG---YRDEVVLKPEEVETRD---AREPVRIRARVLDLGVCRD : 132
YP_180121Ehrlichia   : GDLGLETFVQWQ-ENIFKDVCIHWQPIQHTDTSNNIFHSNVYKDIIVMFIISFALKHDNLNLTKELSLSLRIKYAVCKD : 142
                        : G aG6Pp                               6 5P P Ig Y V 1P                               6 g6C 1

NP_697507Brucella      : TCVFVLAEEFDFFLLADRQKSSSENLAARTVVEVTAFAQLHAFASPD-FGVSAVKHDKDEAIFDVALPDPN---AFAELEFV : 213
NP_353804Agrobacteri  : ICIPFPAKFSISRGNAAADDSEE---RRLEEARETLPEASDD-FKVDFHTPDKTMLGVLQLEPENAPKETEIEFI : 221
YP_354084Rhodobacter : TCVHADFFELDGELGFPVG-----APDPIISAALRSREETGREAGVCRVACRVDPIDDGLRIETAELDFATGGAEVVV : 203
YP_180121Ehrlichia   : VCIEPQKVIILN-----RFIQDYVNOENLGLINFWKKK----- : 175
                        : 6C6P e                               a lp g                               e

NP_697507Brucella      : ASDT-VNLSAPVSVVE-DGKASQRFIAKMQCKTKLAVIDYT---IVQNG-KAVSGRLELD-- : 266
NP_353804Agrobacteri  : AGPSGFAYYEPQNTIV-RDKRRLSIFYMNIKGLPKTYQVPGNSWPIIVKSCDRAMETVLNFPKP : 282
YP_354084Rhodobacter : MEPGTFAIWTSEAVTSRQCARLVAVSDLVGPDGVFFALDRSAVTITVLEDRRAVEIRGCEAP : 265
YP_180121Ehrlichia   : ----- : -
                        :                               g g
    
```

D

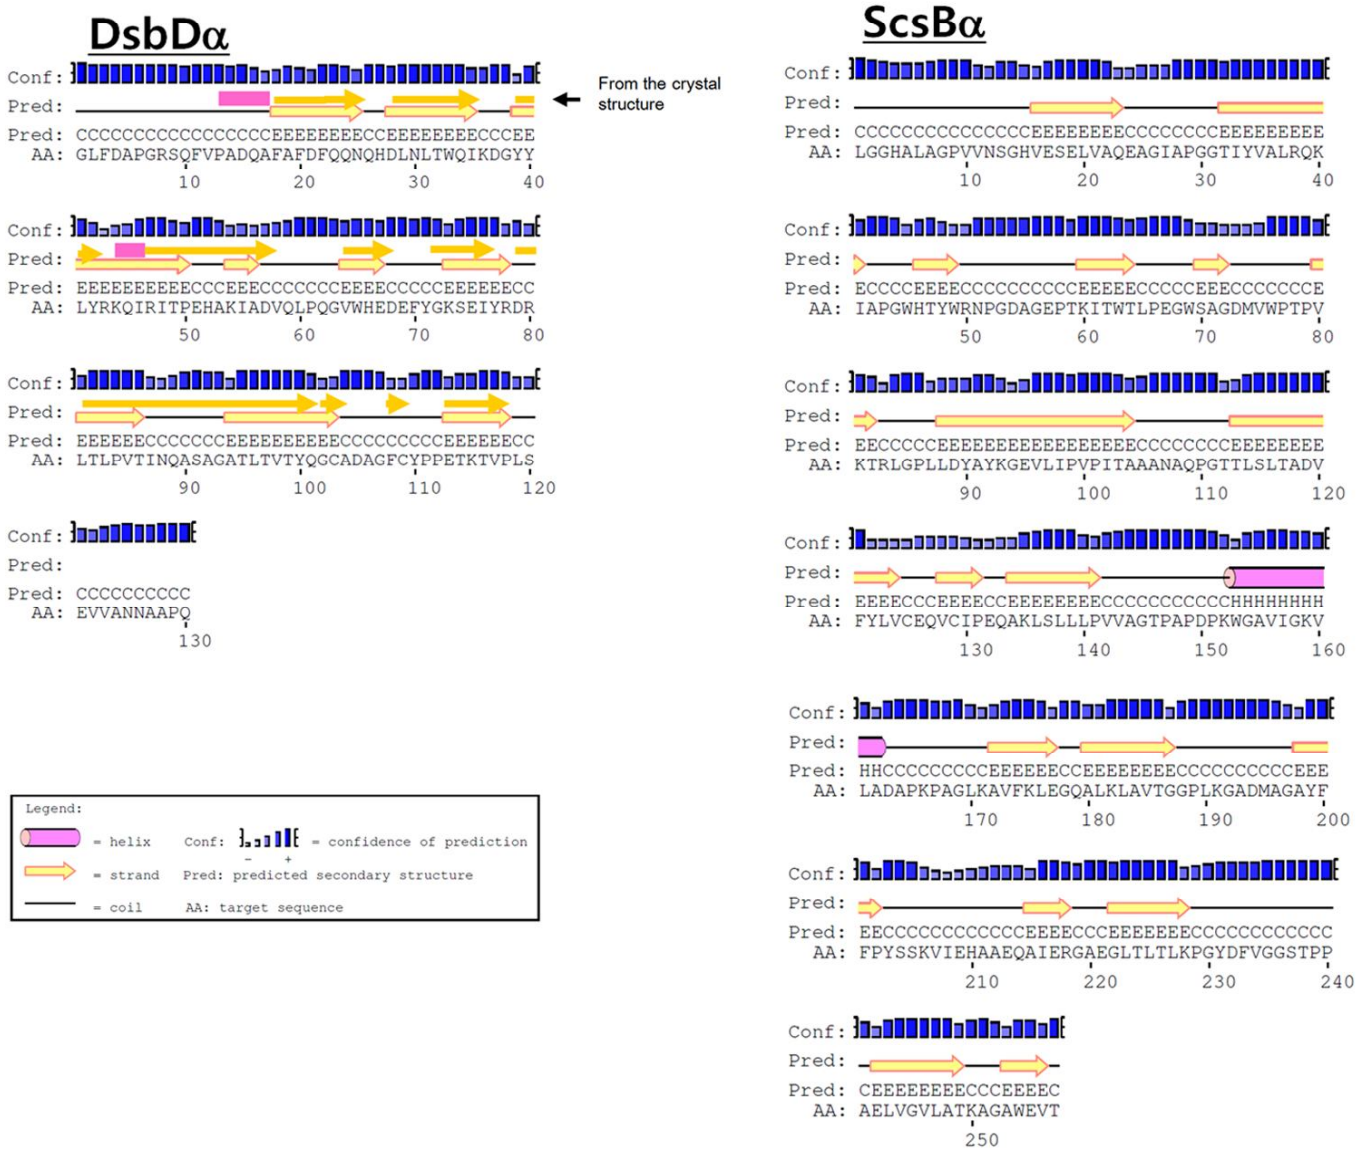

Supplement: mbo002121256sf01.pdf [file mbo002121256sf01.pdf]
