# Supplementary material for: A New Family of Membrane Electron Transporters and Its Substrates, Including a New Cell Envelope Peroxiredoxin, Reveal a Broadened Reductive Capacity of the Oxidative Bacterial Cell Envelope
Source: PubMed Central journal article supplement — mBio. 2012 Apr 3;3(2):e00291-11. doi: 10.1128/mBio.00291-11 (PMC3322552; doi:10.1128/mbio.00291-11), 2012-04-03

**A**

Score = 29.6 bits (65), Expect = 3.5, Method: Compositional matrix adjust.  
 Identities = 20/70 (29%), Positives = 34/70 (49%), Gaps = 5/70 (7%)

Query 50 GAKHPKLT LVNFTDYNCPYCKQL----DPMLEK-IVQKYPDVAVI IKPLPFKGESSVLA A 104  
 G K + + F D CPYCKQ P ++ VQ + + IKP +++LA+  
 Sbjct 110 GK KDAPVIVYVFADPFPCPYCKQFWQQARPWVDSGK VQLRTL LVGV IKPESPATAAA I LAS 169

Query 105 RIALTTWREH 114 ← ScsC  
 + TW+++

Sbjct 170 KDPAKTWQQY 179 ← DsbG

**B**

Score = 28.1 bits (61), Expect = 7.5, Method: Compositional matrix adjust.  
 Identities = 36/160 (23%), Positives = 59/160 (37%), Gaps = 31/160 (19%)

Query 103 APQEKHVI TVFTDITCGYCHKLHEQMA----DYNALGITVRYLAF----- 143  
 A K + FTD C YC +L + Y + + ++ L F  
 Sbjct 51 AKHPKLT LVNFTDYNCPYCKQLDPMLEKIVQKYPDVAVI IKPLPFKGESSVLAARIALTT 110

Query 144 ----PRQGLSDAEKEMKAIWCAKDKNKAFDDVMAGKSVAPASCDVDIADHYALGVQL-- 197  
 P+Q L + K ++ D K AG + P + D + +QL  
 Sbjct 111 WREHPQQFLALHEKLMQKR VYHTDDS IKQAQQ-KAGAT--PVTLDEKSMETIRTNLQLAR 167

Query 198 --GVSGTPAVVLSNGTLVPGYQPPKEMKEFLDEHQKMTSG 235 ← DsbC  
 GV GTPA ++ + L+PG P ++ + E +G

Sbjct 168 LVGVQGTPATIIGD-ELIPGAVP WDTLEAVVKEK LASANG 206 ← ScsC

**C**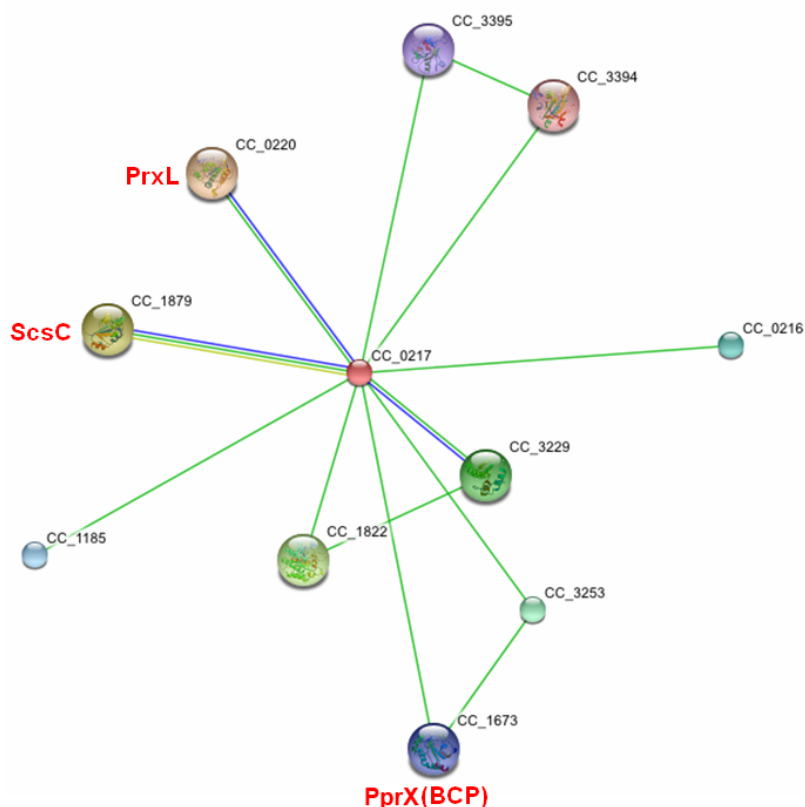

Supplement: mbo002121256sf02.pdf [file mbo002121256sf02.pdf]
