# Supplementary material for: A New Family of Membrane Electron Transporters and Its Substrates, Including a New Cell Envelope Peroxiredoxin, Reveal a Broadened Reductive Capacity of the Oxidative Bacterial Cell Envelope
Source: PubMed Central journal article supplement — mBio. 2012 Apr 3;3(2):e00291-11. doi: 10.1128/mBio.00291-11 (PMC3322552; doi:10.1128/mbio.00291-11), 2012-04-03
Supplement: mbo002121256sf03.pdf [file mbo002121256sf03.pdf]

*pscsB*(Km)/  $\Delta$ *scsB*

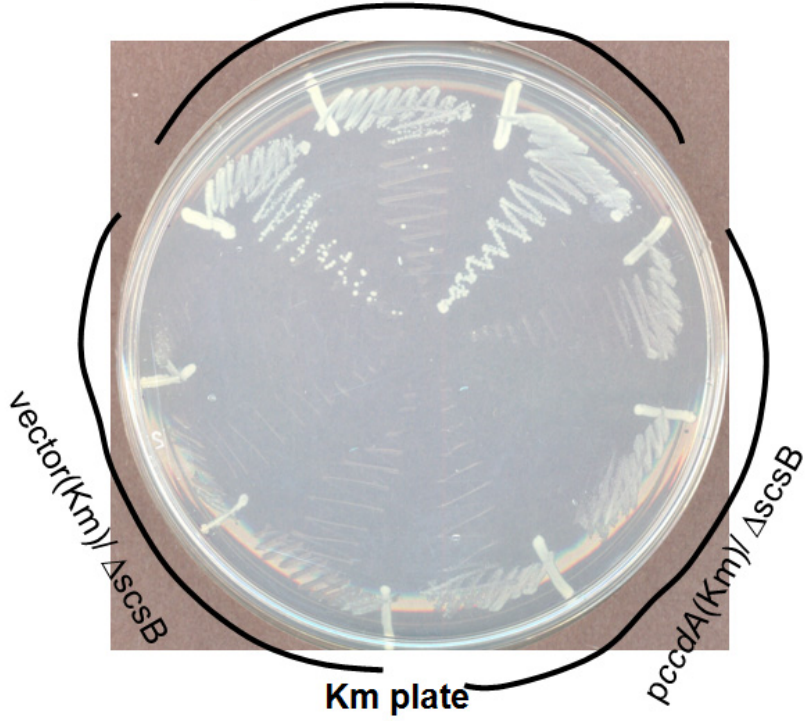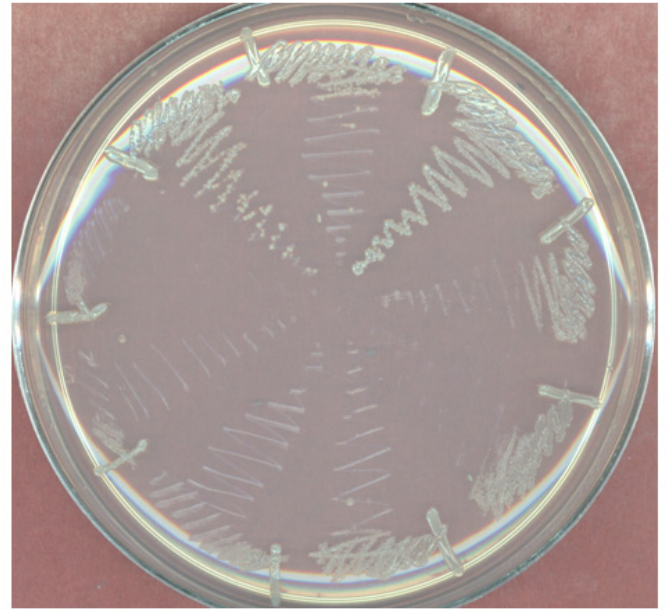

*pscsB*(Cm)/  $\Delta$ *scsB*

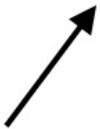

**Cm plate**

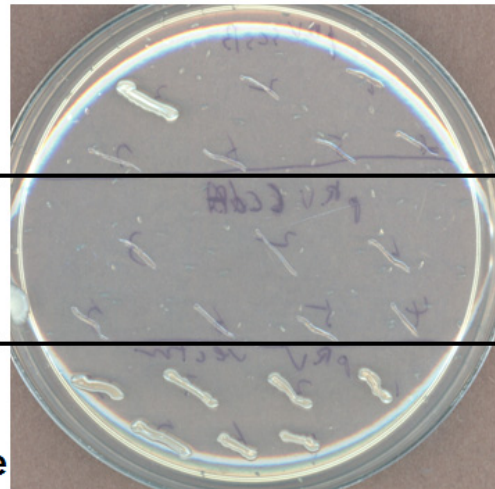

*pscsB*(Km)/  $\Delta$ *scsB*

*pccdA*(Km)/  $\Delta$ *scsB*

*vector*(Km)/  $\Delta$ *scsB*
