# Supplementary material for: A New Family of Membrane Electron Transporters and Its Substrates, Including a New Cell Envelope Peroxiredoxin, Reveal a Broadened Reductive Capacity of the Oxidative Bacterial Cell Envelope
Source: PubMed Central journal article supplement — mBio. 2012 Apr 3;3(2):e00291-11. doi: 10.1128/mBio.00291-11 (PMC3322552; doi:10.1128/mbio.00291-11), 2012-04-03
Supplement: mbo002121256sf04.pdf [file mbo002121256sf04.pdf]

**A****CC0374** : a putative DsbA homolog**CC0375** : a putative DsbA homolog**CC1879** : CcScsC**CC0220** : CcPrxL**CC2210** : thiol:disulfide interchange protein **TipA**

MNEVQSGQNGEEAKKRNP**MALAGVILLGVA**AVLYVIASAS**FKPSG**PADL**TEFK**  
 KGAF**EKL**DVPATPRP**APTTVFTSMDGKPTTLAD**FKGRVV**VMNLWATW**CA**PC**KAE  
 MPTLAKLQAA**YATQP**VT**VLPI**SVD**RSDLN**LVREEMAAN**PPLVTY**RDP**SYKLS**FDL  
 QPRAQGYPTT**IIYDR**QGRERARLAGPADWSA**PEVRGIVEK**L**LAEK**

**CC3666** : hypothetical protein

MRS**MRKAALS**LFSLVLS**GVVATLSWGGV**AWAQPPVV**VELFTAQGCSS**CGKAN  
 QVAADLAKQDGVLALTYAVDYWDYLGW**KDTFAK**PVFAERQRAYAK**KFALRD**VPTP  
 QMVVAGRVQASG**TKAE**AVEDLVKTAARAR**LNP**DMQFIGAARVAVGSG**PAPRGG**  
 GEVWLVRYPREQDIAIKRGDNKGQTLVHRNVREL**VRLGPWAGKPKLYR**LPAAN  
 DADLVTVVLVQGA**KGRILGVL**QSAGEAKR

**CC3674** : thiol:disulfide interchange protein CycY (**CcmG** homolog)

MKR**WLA**FSPL**IVLVALAVL**FAGYALQRDPRVQ**PQALV**GK**PMPALMLP**DLDTGRPA  
 PLRQ**TGEG**PILV**NFFASW**CA**PC**EV**EH**PQLM**ALKAQ**GV**TVVGI**AYKDAPANTQA**FLT**  
 RLGDPFAAKR**VDRDGR**AGLEFGVTGVPETYLVGSDGV**IIAKHTG**PLTPDAAEDLLK  
 QAK

**CC0249** : SCO1/2 family protein

MPRHRL**VLILACV**GLAVAVGLAW**NVGV**FRSEPA**VTVGGPF**ELVDQNGAPTSEKA  
 LKGKWSAVFFGFTY**CPDVC**PGTLQGLAAATDQLGPKAKDFQIVFISIDPARDTV**KQ**  
 MKAYLSAPYVPKATIGLTGTQAQV**DAAKAYRVYHAKV**GDGVDYTM**DHSTAI**YLMD  
 PKGRFKTVIPY**NLPPDEI**ARRIKDAVREG

**CC3503** : SCO1/2 family protein

**MRAIALTL**ALLAAT**PLAGC**GEKAAQDAAGAVIKGGPFQ**L**TDMNGK**PVTEK**SLLGK  
 PTAVFFGFTY**CPEV**CP**PTTL**EMTAWL**KALGK**DADK**LN**VV**LITV**DPERDTPAQL**KEYL**  
 SNFD**PRIQ**GFTGTPDAIAKTARAYRVY**YQKV**PLDGGGYTIDHSSAIY**L**FD**AKGR**FVS  
 PIAYQAPQDRALGQLRDLLK

**B**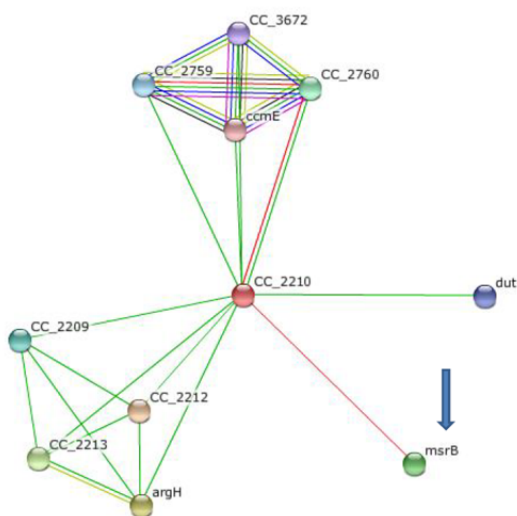**C**

Score = 99.8 bits (247), Expect = 8e-27, Method: Compositional matrix adjust  
 Identities = 65/204 (32%), Positives = 100/204 (49%), Gaps = 12/204 (6%)

|       |     |          |                        |                   |               |              |                  |                  |         |
|-------|-----|----------|------------------------|-------------------|---------------|--------------|------------------|------------------|---------|
| Query | 7   | SATRRIP  | LV                     | IATVAVG           | LAGFAALYGL    | LSRAP        | TGDPACRAAVATAQKI | APLAHGEVAAL      | 66      |
|       |     | A +R     | P+                     | +A                | V L A LY + +  | PA           | + G L            |                  |         |
| Sbjct | 12  | EAKKRNP  | M                      | RMALAGV           | ILLGVA        | AVLYVIASAS   | FKPSGPA-----     | DLTEFKKGA        | FEKL 62 |
|       |     |          |                        |                   |               |              |                  |                  |         |
| Query | 67  | TMASAP   | LKLPDLAFEDADGKPKKLSDFR | GKTL              | LVNLWATWCVPCR | KEMPALDE     | LOGKLSG          | 126              |         |
|       |     | + + P    | P F DGKP               | L+DF+G+           | +++NLWATWC    | PC+ EMP      | L +LQ +          |                  |         |
| Sbjct | 63  | DVPATPR  | PAPTTVFTSMDGKPTTLAD    | FKGRVV            | VMNLWATWCA    | PCKAEMPTLAKL | QAA              | YAT 122          |         |
|       |     |          |                        |                   |               |              |                  |                  |         |
| Query | 127 | PNFEVVA  | INIDTRDPEKPKTFLKEANL   | TRLGYFNDQKAKVFQDL | KAIGRALGMPT   | SVLVD        | 186              |                  |         |
|       |     | V+ I++D  | RD + + A               | L + D             | K+ DL+ RA     | G PT+++      | D                |                  |         |
| Sbjct | 123 | QPVT     | VLPI                   | SVDRSDLN          | LVREEMAANP    | PLVTYRDP     | SYKLSFDLQP--     | RAQGYPTTIIYD 179 |         |
|       |     |          |                        |                   |               |              |                  |                  |         |
| Query | 187 | POGCE    | IATIAGPAEWASE          | DALKLI            | 210           |              |                  |                  |         |
|       |     | QG E A   | +AGPA+W++              | + +               |               |              |                  |                  |         |
| Sbjct | 180 | ROGRERAR | LAGPADWSA              | PEVRGIV           | 203           |              |                  |                  |         |

← **BrTipA**← **CcTipA**
