# Supplementary material for: A New Family of Membrane Electron Transporters and Its Substrates, Including a New Cell Envelope Peroxiredoxin, Reveal a Broadened Reductive Capacity of the Oxidative Bacterial Cell Envelope
Source: PubMed Central journal article supplement — mBio. 2012 Apr 3;3(2):e00291-11. doi: 10.1128/mBio.00291-11 (PMC3322552; doi:10.1128/mbio.00291-11), 2012-04-03
Supplement: mbo002121256sf05.pdf [file mbo002121256sf05.pdf]

# A

Score = 32.7 bits (73), Expect = 0.57, Method: Compositional matrix adjust.  
Identities = 35/138 (26%), Positives = 52/138 (38%), Gaps = 27/138 (19%)

```
Query 89 PAGTITVTEFFDYRCGYCRQATPAVLELVQKNPDIRLVLKDFVIFGNDSEAAARIALGAK 148
      P   +T F D CGYC +   + +   +R +   +D+E +   AK
Sbjct 104 PQEKHVITVFTDITCGYCHKLHEQMADYNALGITVRYLAFPRQGLSDAEKEMKAIWCAK 163

Query 149 DQGKSLELHKALMAENALDARGALRIAERLGI DMDKAKAVGESQAITQHLADTDALARAL 208
      D+ K           A D  A +   D+D           +AD AL  L
Sbjct 164 DKNK-----AFDDVMAGKSVAPASCDVD-----IADHYALGVQL 197

Query 209 NLSGTPAFIVGD-TLVPG 225           Cc ScsC
      +SGTPA ++ + TLVPG
Sbjct 198 GVSGTPAVVLSNGTLVPG 215           DsbC
```

# B

pDSW204::*dsbAss-Cc scsC-His*

pDSW204

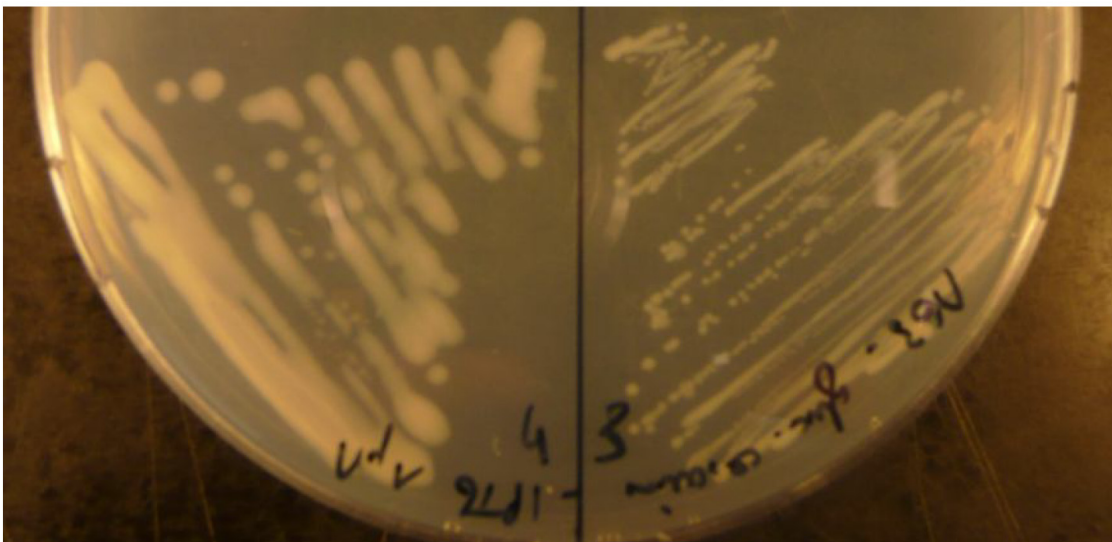

PLD262: *dsbC mdoG E. coli*
