# Supplementary material for: A New Family of Membrane Electron Transporters and Its Substrates, Including a New Cell Envelope Peroxiredoxin, Reveal a Broadened Reductive Capacity of the Oxidative Bacterial Cell Envelope
Source: PubMed Central journal article supplement — mBio. 2012 Apr 3;3(2):e00291-11. doi: 10.1128/mBio.00291-11 (PMC3322552; doi:10.1128/mbio.00291-11), 2012-04-03
Supplement: mbo002121256st1.pdf [file mbo002121256st1.pdf]

**Table S1.** The distribution of DsbD, CcdA, ScsB, ScsC, PprX, and PrxL from 529 bacteria. The bacteria used are based on the STRING 8.3 website (<http://string83.embl.de/>) and the phylogenetic tree is also adopted from the STRING website. The presence of homologous proteins is based on the STRING analysis, BLAST, and analyses using a microbewebsite (<http://www.microbesonline.org/>).

#### Note

1. Selected are ScsC homologs which have the N-terminal helical domain (see the text). PSI BLAST and SRING analysis were used for the primary selection and then the homologous sequence motif with EHPE was used for the secondary selection since this sequence motif is well conserved in the putative hinge region of the N-terminal helical domain as shown in Fig. S6A. Many ScsC variants including prototypic ScsC are found in diverse bacteria. It appears that ScsC is widely used for many kinds of redox reactions in many ways in bacteria. Because of this diversity of ScsC and the established relationships between CcScsB and CcScsC, we only included CcScsC type in Table 1 and Table S1, and its occurrence correlation with ScsB appears to be very good.
2. ScsB $\alpha$  domain appears to have two sub-domains (see the text). The N-terminal sub-domain is relatively well conserved while the C-terminal sub-domain is not. Related to this observation, we could find ScsB $\alpha$ s in some bacteria which do not have C-terminal sub-domain.
3. These organisms containing CcdA or ScsB $\beta\gamma$  do contain separate ScsB $\alpha$  but not full-length ScsB in most of the cases (see the text).
4. In ScsB $\beta$ , the transmembrane segment 1 which contains the first putative redox-active cysteine appears to be highly conserved as shown in Fig. S1A. A Lys residue in the 8th position at the C-terminus of the first cysteine in ScsB $\beta$  is especially conserved and typical in ScsB (not found in DsbD and CcdA). All the tested ScsB $\beta$  has this Lys residue. So, the presence of this residue was used as one method to discriminate ScsB $\beta$  from DsbD $\beta$  and CcdA.
5. This kind of ScsB $\alpha$  has two conserved cysteines in the C-terminal sub-domain as well as those in the N-terminal sub-domain.
6. This kind of DsbD has additional long amino-acid sequences at the C-terminus of DsbD $\alpha$ , which might be a long linker or another putative sub-domain found in ScsB $\alpha$ .
7. This kind of DsbD or ScsB has two DsbD $\alpha$  domains at the N-terminus.
8. In *Salmonella*, in addition to StScsC which is not included in this table, another ScsC homolog is found which has the N-terminal helical domain like CcScsC. The gene is annotated as *bcfH*, a gene in a *bcf* operon to encode proteins for fimbria.
9. This kind of DsbD has only DsbD $\beta\gamma$ .
10. PrxL forms a fusion protein with TlpA.
11. DsbD of *Bacteroides* in Fig. 2 forms a separate branch from the other DsbD members in the tree. Indeed, the conserved sequences appear to be very different from those of DsbD and ScsB, possibly forming another group of DsbD family (see the legend of Fig. 2).

| Phylum | Class | Organism Name                              | DsbD | CcdA           | ScsB           |                    |                 | ScsC <sup>1</sup> | PprX | PrxL |
|--------|-------|--------------------------------------------|------|----------------|----------------|--------------------|-----------------|-------------------|------|------|
|        |       |                                            |      |                | α              | whole <sup>4</sup> | py <sup>4</sup> |                   |      |      |
|        |       | Acidiphilium cryptum JF-5                  | -    | -              | -              | +                  | -               | -                 | -    | -    |
|        |       | Gluconobacter oxydans 621H                 | -    | -              | -              | +                  | -               | +                 | +    | -    |
|        |       | Granulibacter bethesdensis_CGDNIH1         | -    | -              | -              | + <sup>2</sup>     | -               | +                 | +    | -    |
|        |       | Magnetospirillum magneticum_AMB-1          | -    | -              | -              | +                  | -               | +                 | -    | -    |
|        |       | Rhodospirillum rubrum_ATCC_11170           | -    | -              | -              | +                  | -               | +                 | -    | -    |
|        |       | Agrobacterium tumefaciens_C58_UWash        | -    | + <sup>3</sup> | +              | -                  | -               | +                 | -    | -    |
|        |       | Rhizobium etli_CFN_42                      | -    | + <sup>3</sup> | +              | -                  | -               | +                 | -    | -    |
|        |       | Rhizobium leguminosarum bv viciae_3841     | -    | + <sup>3</sup> | +              | -                  | -               | +                 | -    | -    |
|        |       | Sinorhizobium medicae_WSM419               | -    | + <sup>3</sup> | +              | -                  | -               | +                 | -    | -    |
|        |       | Sinorhizobium meliloti                     | -    | + <sup>3</sup> | +              | -                  | -               | +                 | -    | -    |
|        |       | Bartonella bacilliformis_KC583             | -    | + <sup>3</sup> | +              | -                  | -               | +                 | -    | -    |
|        |       | Bartonella henselae_Houston-1              | -    | + <sup>3</sup> | +              | -                  | -               | +                 | -    | -    |
|        |       | Bartonella quintana_Toulouse               | -    | +              | -              | -                  | -               | -                 | -    | -    |
|        |       | Bradyrhizobium japonicum                   | -    | + <sup>3</sup> | +              | -                  | -               | +                 | -    | -    |
|        |       | Bradyrhizobium sp. BTA1                    | -    | + <sup>3</sup> | +              | +                  | -               | -                 | -    | -    |
|        |       | Bradyrhizobium sp. ORS278                  | -    | + <sup>3</sup> | +              | +                  | -               | -                 | -    | -    |
|        |       | Nitrobacter hamburgensis_X14               | -    | + <sup>3</sup> | +              | -                  | -               | +                 | -    | -    |
|        |       | Nitrobacter winogradskyi_Nb-255            | -    | + <sup>3</sup> | +              | -                  | -               | +                 | -    | -    |
|        |       | Rhodopseudomonas palustris_BisA53          | -    | + <sup>3</sup> | +              | -                  | -               | +                 | -    | -    |
|        |       | Rhodopseudomonas palustris_BisB18          | +    | + <sup>3</sup> | +              | -                  | -               | +                 | -    | -    |
|        |       | Rhodopseudomonas palustris_BisB5           | +    | + <sup>3</sup> | +              | -                  | -               | +                 | -    | -    |
|        |       | Rhodopseudomonas palustris_CGA009          | -    | + <sup>3</sup> | +              | -                  | -               | +                 | -    | -    |
|        |       | Rhodopseudomonas palustris_HaA2            | +    | + <sup>3</sup> | +              | -                  | -               | +                 | -    | -    |
|        |       | Brucella abortus_9-941                     | -    | + <sup>3</sup> | +              | -                  | -               | +                 | -    | -    |
|        |       | Brucella melitensis                        | -    | + <sup>3</sup> | +              | -                  | -               | +                 | -    | -    |
|        |       | Brucella melitensis biovar_Abortus         | -    | + <sup>3</sup> | +              | -                  | -               | +                 | -    | -    |
|        |       | Brucella suis_1330                         | -    | + <sup>3</sup> | +              | -                  | -               | +                 | -    | -    |
|        |       | Ochrobactrum anthropi_ATCC_49188           | +    | + <sup>3</sup> | +              | -                  | -               | +                 | -    | -    |
|        |       | Mesorhizobium BNC1                         | -    | + <sup>3</sup> | +              | -                  | -               | +                 | -    | -    |
|        |       | Mesorhizobium loti                         | -    | + <sup>3</sup> | +              | -                  | -               | +                 | -    | -    |
|        |       | Parvibaculum lavamentivorans_DS-1          | -    | + <sup>3</sup> | +              | -                  | -               | +                 | -    | -    |
|        |       | Xanthobacter autotrophicus_Py2             | +    | + <sup>3</sup> | +              | -                  | -               | +                 | -    | -    |
|        |       | Anaplasma marginale_St_Maries              | -    | -              | + <sup>2</sup> | -                  | + <sup>3</sup>  | +                 | -    | -    |
|        |       | Anaplasma phagocytophilum_HZ               | -    | -              | + <sup>2</sup> | -                  | + <sup>3</sup>  | +                 | -    | -    |
|        |       | Ehrlichia canis_Jake                       | -    | -              | + <sup>2</sup> | -                  | + <sup>3</sup>  | +                 | -    | -    |
|        |       | Ehrlichia chaffeensis_Arkansas             | -    | -              | + <sup>2</sup> | -                  | + <sup>3</sup>  | +                 | -    | -    |
|        |       | Ehrlichia ruminantium_Gardel               | -    | -              | + <sup>2</sup> | -                  | + <sup>3</sup>  | +                 | -    | -    |
|        |       | Ehrlichia ruminantium_Welgevonden          | -    | -              | + <sup>2</sup> | -                  | + <sup>3</sup>  | +                 | -    | -    |
|        |       | Neorickettsia sennetsu_Miyayama            | -    | -              | -              | -                  | -               | +                 | -    | -    |
|        |       | Orientia tsutsugamushi                     | -    | -              | -              | -                  | -               | +                 | -    | -    |
|        |       | Rickettsia akari_str._Hartford             | -    | -              | -              | -                  | -               | +                 | -    | -    |
|        |       | Rickettsia conorii                         | -    | -              | -              | -                  | -               | +                 | -    | -    |
|        |       | Rickettsia felis_URRWXCa2                  | -    | -              | -              | -                  | -               | +                 | -    | -    |
|        |       | Rickettsia massillae_MTU5                  | -    | -              | -              | -                  | -               | +                 | -    | -    |
|        |       | Rickettsia rickettsii                      | -    | -              | -              | -                  | -               | +                 | -    | -    |
|        |       | Rickettsia bellii_OSU                      | -    | -              | -              | -                  | -               | +                 | -    | -    |
|        |       | Rickettsia bellii_RML                      | -    | -              | -              | -                  | -               | +                 | -    | -    |
|        |       | Rickettsia canadensis_str._McKiel          | -    | -              | -              | -                  | -               | +                 | -    | -    |
|        |       | Rickettsia prowazekii                      | -    | -              | -              | -                  | -               | +                 | -    | -    |
|        |       | Rickettsia typhi_wilmington                | -    | -              | -              | -                  | -               | +                 | -    | -    |
|        |       | Wolbachia sp. Brugia                       | -    | -              | + <sup>2</sup> | -                  | -               | +                 | -    | -    |
|        |       | Wolbachia sp. wMe1                         | -    | -              | -              | -                  | -               | +                 | -    | -    |
|        |       | Candidatus Pelagibacter ubique             | -    | +              | -              | -                  | -               | -                 | -    | -    |
|        |       | <b>Caulobacter crescentus</b>              | -    | -              | -              | +                  | -               | +                 | +    | +    |
|        |       | Erythrobacter litoralis_HTCC2594           | -    | -              | -              | +                  | -               | +                 | -    | -    |
|        |       | Novosphingobium aromaticivorans_DSM_12444  | -    | -              | -              | +                  | -               | +                 | +    | -    |
|        |       | Sphingomonas wittichii_RW1                 | -    | -              | -              | +                  | -               | +                 | +    | -    |
|        |       | Sphingopyxis alaskensis_RB2256             | -    | -              | -              | +                  | -               | +                 | +    | -    |
|        |       | Zymomonas mobilis_ZM4                      | -    | -              | -              | +                  | -               | +                 | +    | -    |
|        |       | Hyphomonas neptunium_ATCC_15444            | -    | -              | -              | +                  | -               | +                 | -    | +    |
|        |       | Maricaulis maris_MCS10                     | -    | -              | -              | +                  | -               | +                 | +    | -    |
|        |       | Jannaschia sp. CCS1                        | -    | + <sup>3</sup> | + <sup>5</sup> | -                  | -               | +                 | -    | -    |
|        |       | Paracoccus denitrificans_PD1222            | -    | + <sup>3</sup> | + <sup>5</sup> | -                  | -               | +                 | -    | -    |
|        |       | Rhodobacter sphaeroides_17025              | -    | + <sup>3</sup> | + <sup>5</sup> | -                  | -               | +                 | -    | -    |
|        |       | Rhodobacter sphaeroides_17029              | -    | + <sup>3</sup> | + <sup>5</sup> | -                  | -               | +                 | -    | -    |
|        |       | Rhodobacter sphaeroides_2_4_1              | -    | + <sup>3</sup> | + <sup>5</sup> | -                  | -               | +                 | -    | -    |
|        |       | Roseobacter denitrificans_OCH_114          | -    | + <sup>3</sup> | + <sup>5</sup> | -                  | -               | +                 | -    | -    |
|        |       | Silicibacter pomeroyi_DSS-3                | -    | + <sup>3</sup> | + <sup>5</sup> | -                  | -               | +                 | -    | -    |
|        |       | Silicibacter sp. TM1040                    | -    | + <sup>3</sup> | + <sup>5</sup> | -                  | -               | +                 | -    | -    |
|        |       | Acidovorax avenae_subsp._avenae_ATCC_19860 | -    | -              | -              | +                  | -               | -                 | -    | -    |
|        |       | Acidovorax sp. JS42                        | +    | -              | -              | +                  | -               | -                 | -    | -    |
|        |       | Polaromonas naphthalenivorans_CJ2          | -    | +              | -              | +                  | -               | -                 | +    | -    |
|        |       | Polaromonas sp. JS666                      | +    | -              | -              | +                  | -               | -                 | -    | -    |
|        |       | Rhodoferax ferrireducens_T118              | -    | +              | -              | +                  | -               | -                 | -    | -    |
|        |       | Verminephrobacter eiseniae_EF01-2          | -    | -              | -              | +                  | -               | -                 | -    | -    |
|        |       | Bordetella bronchiseptica                  | +    | -              | -              | -                  | -               | -                 | +    | -    |
|        |       | Bordetella parapertussis                   | +    | -              | -              | -                  | -               | -                 | +    | -    |
|        |       | Bordetella pertussis                       | +    | -              | -              | -                  | -               | -                 | +    | -    |
|        |       | Burkholderia ambifaria                     | +    | -              | -              | -                  | -               | -                 | +    | -    |
|        |       | Burkholderia cenocepacia_AU_1054           | +    | -              | -              | -                  | -               | -                 | +    | -    |
|        |       | Burkholderia cenocepacia_H12424            | +    | -              | -              | -                  | -               | -                 | +    | -    |
|        |       | Burkholderia sp. 383                       | +    | -              | -              | -                  | -               | -                 | +    | -    |
|        |       | Burkholderia vietnamiensis_G4              | +    | -              | -              | -                  | -               | -                 | +    | -    |
|        |       | Burkholderia pseudomallei_1106a            | +    | -              | -              | -                  | -               | -                 | +    | -    |
|        |       | Burkholderia pseudomallei_1710b            | +    | -              | -              | -                  | -               | -                 | +    | -    |
|        |       | Burkholderia pseudomallei_668              | +    | -              | -              | -                  | -               | -                 | +    | -    |
|        |       | Burkholderia pseudomallei_K96243           | +    | -              | -              | -                  | -               | -                 | +    | -    |

Alpha



Gamma

|                                                    |                |   |   |                |   |   |   |   |   |
|----------------------------------------------------|----------------|---|---|----------------|---|---|---|---|---|
| Shigella flexneri_2a                               | +              | - | - | -              | - | - | - | - | - |
| Shigella flexneri_2a_2457T                         | +              | - | - | -              | - | - | - | - | - |
| Shigella flexneri_5_8401                           | +              | - | - | -              | - | - | - | - | - |
| Shigella sonnei_Ss046                              | +              | - | - | -              | - | - | - | - | - |
| Sodalis glossinidius_morsitans                     | +              | - | - | +              | - | + | - | - | - |
| Wigglesworthia_brevipalpis                         | -              | - | - | -              | - | - | - | - | - |
| Yersinia enterocolitica_subsp._enterocolitica_8081 | +              | - | - | +              | - | + | - | - | - |
| Yersinia_pestis_Antiqua                            | +              | - | - | -              | - | - | - | - | - |
| Yersinia_pestis_CO92                               | +              | - | - | -              | - | - | - | - | - |
| Yersinia_pestis_KIM                                | +              | - | - | -              | - | - | - | - | - |
| Yersinia_pestis_Microtus                           | +              | - | - | -              | - | - | - | - | - |
| Yersinia_pestis_Nepal516                           | +              | - | - | -              | - | - | - | - | - |
| Yersinia_pestis_Pestoides                          | +              | - | - | -              | - | + | - | - | - |
| Yersinia_pseudotuberculosis_IP31758                | +              | - | - | -              | - | - | - | - | - |
| Yersinia_pseudotuberculosis_IP32953                | +              | - | - | -              | - | - | - | - | - |
| Colwellia psychrerythraea_34H                      | +              | - | - | -              | - | - | - | + | - |
| Idiomarina loihiensis_L2TR                         | +              | - | - | +              | - | + | - | - | - |
| Marinobacter aquaeolei_VT8                         | +              | + | - | -              | + | - | - | - | - |
| Saccharophagus_degradans_2-40                      | +              | - | - | +              | - | + | - | - | + |
| Pseudoalteromonas_atlantica_T6c                    | +              | - | - | -              | - | - | - | - | - |
| Pseudoalteromonas_haloplanktis_TAC125              | +              | - | - | -              | - | - | - | - | - |
| Psychromonas_ingrahamii_37                         | -              | - | - | +              | - | + | - | - | - |
| Shewanella_amazonensis_SB2B                        | +              | - | - | +              | - | - | - | - | - |
| Shewanella_baltica_OS155                           | +              | - | - | +              | - | - | - | - | - |
| Shewanella_baltica_OS185                           | +              | - | - | +              | - | + | - | - | - |
| Shewanella_denitrificans_OS217                     | +              | - | - | -              | - | - | - | - | - |
| Shewanella_frigidimarina_NCIMB_400                 | +              | - | - | -              | - | - | - | - | - |
| Shewanella_loihiensis_PV-4                         | +              | - | - | -              | - | + | - | + | - |
| Shewanella_oneidensis                              | +              | - | - | -              | - | - | - | - | - |
| Shewanella_pealeana_ATCC_700345                    | +              | - | - | +              | - | - | - | + | - |
| Shewanella_putrefaciens                            | +              | - | - | +              | - | + | - | - | - |
| Shewanella_sediminis_HAW-EB3                       | +              | - | - | +              | - | + | - | + | - |
| Shewanella_sp._ANA3                                | +              | - | - | -              | - | - | - | - | - |
| Shewanella_sp._MR-4                                | +              | - | - | -              | - | - | - | - | - |
| Shewanella_sp._MR-7                                | +              | - | - | -              | - | - | - | - | - |
| Shewanella_sp._W3181                               | +              | - | - | +              | - | + | - | - | - |
| Coxiella burnetii_493                              | +              | - | - | -              | - | + | - | - | - |
| Coxiella burnetii_Dugway                           | +              | - | - | -              | - | + | - | - | - |
| Legionella_pneumophila_Corby                       | +              | - | - | -              | - | + | - | - | - |
| Legionella_pneumophila_Lens                        | +              | - | - | -              | - | + | - | - | - |
| Legionella_pneumophila_Paris                       | +              | - | - | -              | - | + | - | - | - |
| Legionella_pneumophila_Philadelphia_1              | +              | - | - | -              | - | + | - | - | - |
| Dichelobacter_nodosus_VCS1703A                     | + <sup>6</sup> | - | - | -              | - | - | - | - | - |
| Francisella_tularensis_FSC_198                     | -              | - | - | -              | - | - | - | - | - |
| Francisella_tularensis_S4                          | -              | - | - | -              | - | - | - | - | - |
| Francisella_tularensis_WY96                        | -              | - | - | -              | - | - | - | - | - |
| Francisella_tularensis_FTA                         | -              | - | - | -              | - | - | - | - | - |
| Francisella_tularensis_OSU18                       | -              | - | - | -              | - | - | - | - | - |
| Francisella_tularensis_holarctica                  | -              | - | - | -              | - | - | - | - | - |
| Francisella_tularensis_novicida                    | -              | - | - | -              | - | - | - | - | - |
| Thiomicrospira_crunogena_XCL-2                     | + <sup>7</sup> | - | - | -              | - | - | - | - | - |
| Methylococcus_capsulatus_Bath                      | + <sup>7</sup> | - | - | -              | - | - | - | - | - |
| Photobacterium_profundum_S59                       | -              | - | - | +              | - | + | - | - | - |
| Vibrio_cholerae_N16961                             | +              | - | - | -              | - | - | - | - | - |
| Vibrio_cholerae_0395                               | +              | - | - | -              | - | - | - | - | - |
| Vibrio_fischeri_ES114                              | +              | - | - | +              | + | + | - | - | - |
| Vibrio_harveyi                                     | +              | - | - | +              | - | + | - | - | - |
| Vibrio_paraahaemolyticus                           | +              | - | - | +              | - | + | - | - | - |
| Vibrio_vulnificus_CMCP6                            | +              | - | - | -              | - | - | - | - | - |
| Vibrio_vulnificus_YJ016                            | +              | - | - | -              | - | - | - | - | - |
| Xanthomonas_axonopodis_pv._citri_str._306          | -              | - | - | + <sup>7</sup> | - | - | - | - | - |
| Xanthomonas_campestris_33913                       | -              | - | - | + <sup>7</sup> | - | - | - | - | - |
| Xanthomonas_campestris_8004                        | -              | - | - | + <sup>7</sup> | - | - | - | - | - |
| Xanthomonas_campestris_vesicatoria_85-10           | +              | - | - | + <sup>7</sup> | - | - | - | - | - |
| Xanthomonas_oryzae_KACC10331                       | -              | - | - | + <sup>7</sup> | - | - | - | - | - |
| Xanthomonas_oryzae_MAFF_311018                     | -              | - | - | + <sup>7</sup> | - | - | - | - | - |
| Xylella_fastidiosa_9a5c                            | -              | - | - | + <sup>7</sup> | - | - | - | - | - |
| Xylella_fastidiosa_Temecula1                       | -              | - | - | + <sup>7</sup> | - | - | - | - | - |
| Anaeromyxobacter_dehalogenans_2CP-C                | + <sup>9</sup> | + | - | -              | - | - | - | - | - |
| Anaeromyxobacter_sp._Fw109-5                       | + <sup>9</sup> | + | - | -              | - | - | - | - | - |
| Myxococcus_xanthus_DK_1622                         | + <sup>9</sup> | + | - | +              | - | - | - | - | + |
| Bdellovibrio_bacteriovorus                         | +              | - | - | -              | - | - | - | - | - |
| Desulfotalea_psychrophila_Lsv54                    | -              | + | - | -              | - | - | - | - | - |
| Desulfovibrio_desulfuricans_G20                    | -              | - | - | +              | - | - | - | - | - |
| Desulfovibrio_vulgaris_DP4                         | -              | - | - | +              | - | + | - | - | - |
| Desulfovibrio_vulgaris_Hildenborough               | -              | - | - | +              | - | + | - | - | - |
| Lawsonia_intracellularis_PHE_MN1-00                | -              | - | - | +              | - | + | - | - | - |
| Geobacter_metallireducens_GS-15                    | -              | + | - | -              | - | - | - | - | - |
| Geobacter_sulfurreducens                           | -              | + | - | -              | - | - | - | - | - |
| Geobacter_uranireducens_RF4                        | -              | + | - | -              | - | - | - | - | - |
| Pelobacter_carbinolicus                            | -              | + | - | -              | - | - | - | - | - |
| Pelobacter_propionicus_DSM_2379                    | -              | + | - | -              | - | - | - | - | - |
| Syntrophobacter_fumaroxidans_MPOB                  | + <sup>9</sup> | + | - | -              | - | - | - | - | - |
| Syntrophus_aciditrophicus_SB                       | -              | + | - | -              | - | - | - | - | - |
| Arcobacter_butleri_RM4018                          | +              | - | - | -              | - | - | - | - | - |
| Campylobacter_concisus_13826                       | +              | - | - | -              | - | - | - | - | - |
| Campylobacter_curvus_525.92                        | +              | - | - | -              | - | - | - | - | - |
| Campylobacter_fetus                                | +              | - | - | -              | - | - | - | - | - |
| Campylobacter_hominis_ATCC_BAA-381                 | +              | - | - | -              | - | - | - | - | - |
| Campylobacter_jejuni_11168                         | +              | - | - | -              | - | - | - | - | - |

Delta
