# Supplementary figures and images for: A New Family of Membrane Electron Transporters and Its Substrates, Including a New Cell Envelope Peroxiredoxin, Reveal a Broadened Reductive Capacity of the Oxidative Bacterial Cell Envelope
Source: PubMed Central journal article supplement — mBio. 2012 Apr 3;3(2):e00291-11. doi: 10.1128/mBio.00291-11 (PMC3322552; doi:10.1128/mbio.00291-11), 2012-04-03

**A**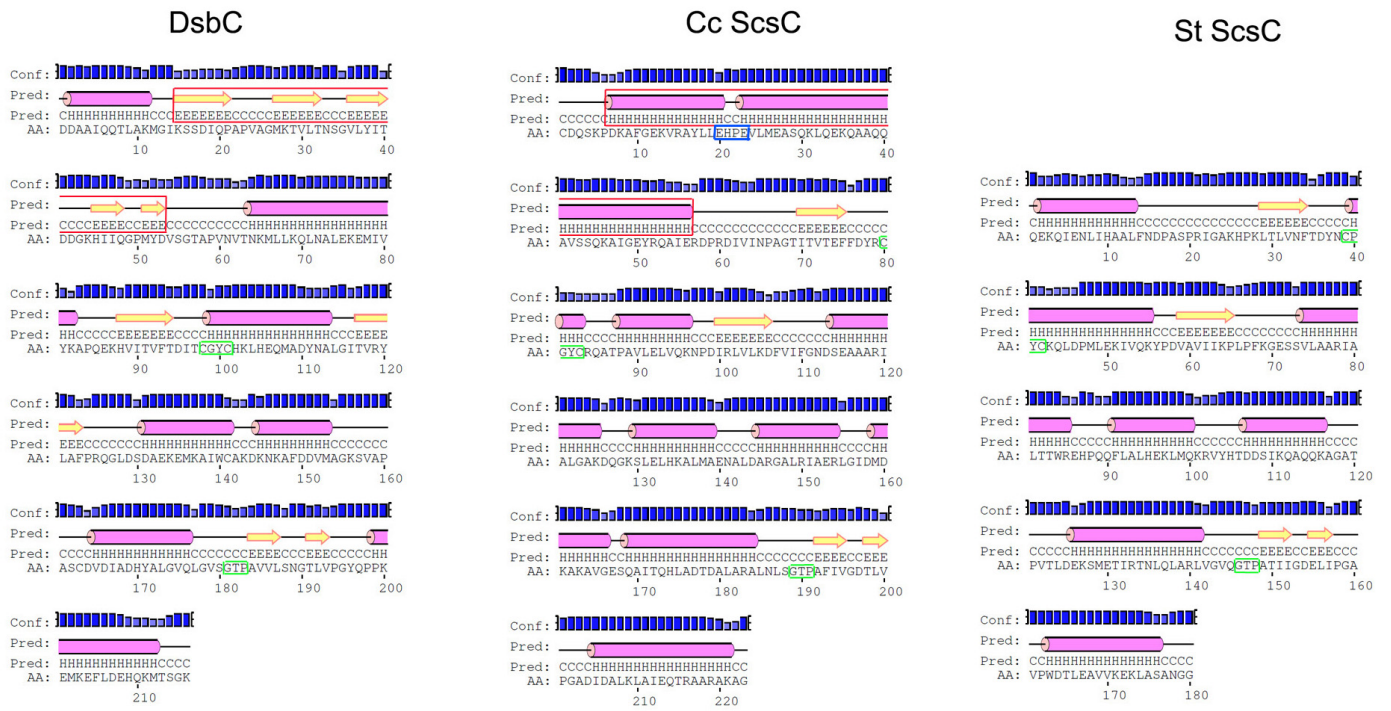**B**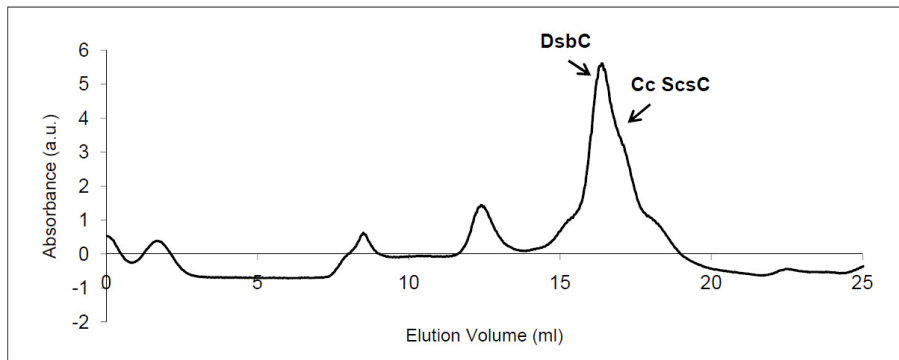**C**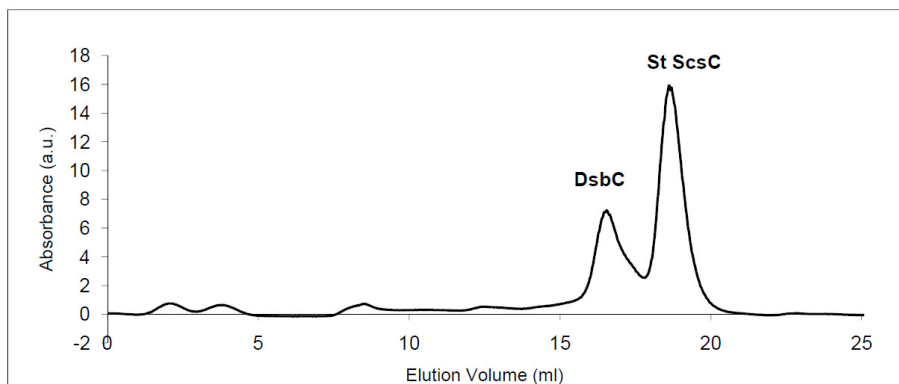

Supplement: mbo002121256sf06.pdf [file mbo002121256sf06.pdf]

**A**

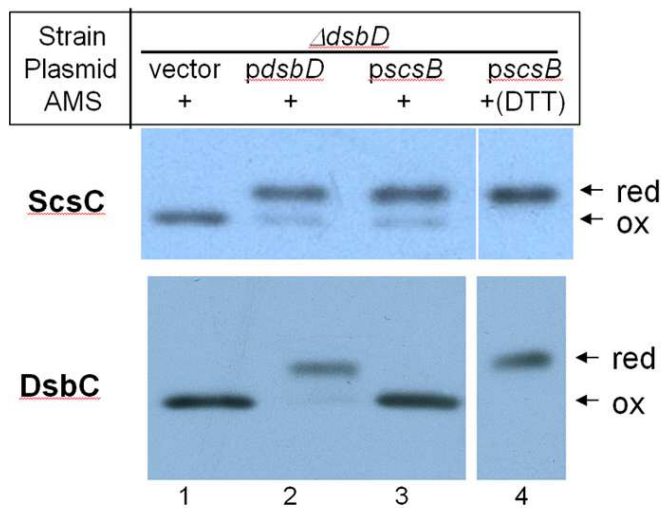

**B**

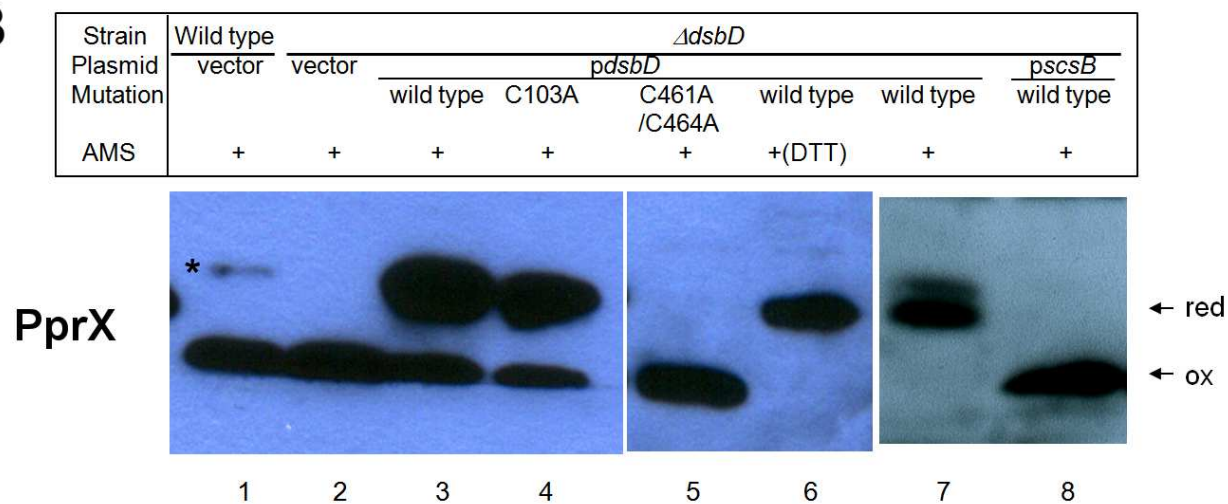

Supplement: mbo002121256sf07.pdf [file mbo002121256sf07.pdf]
